# Supplementary material
Source: Springer Nature journal article supplement (https://www.springermedizin.de/resource/supplementary/13054_2012_667_MOESM3_ESM.pdf/9708950)
Supplement: MOESM3 [file 9708950]

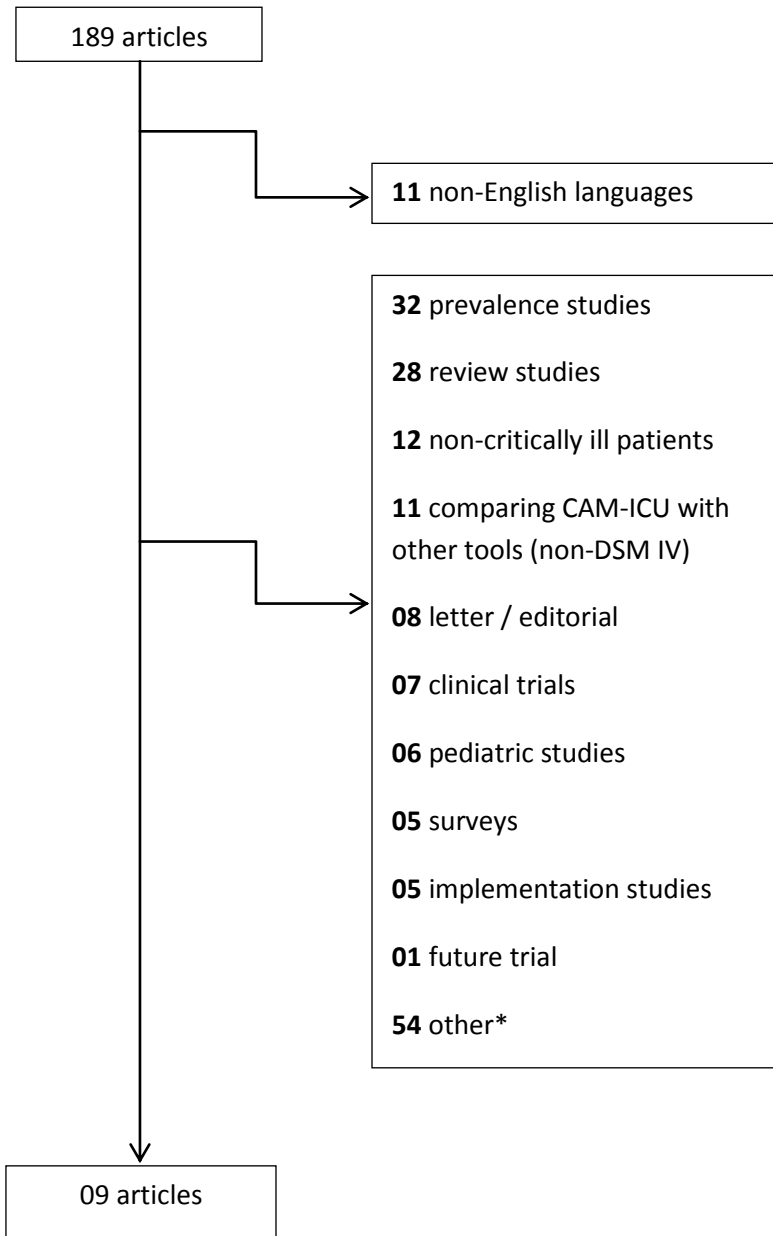

\*Protocol evaluations, prognostic studies, delirium versus intervention, delirium versus biomarkers, etc.
